# Supplementary material for: Global Lysine Acetylome Analysis of Desiccated Somatic Embryos of Picea asperata
Source: Front Plant Sci. 2016 Dec 23;7:1927. doi: 10.3389/fpls.2016.01927 (PMC5179564; doi:10.3389/fpls.2016.01927)
Supplement: Supplementary Table S3 — Conservation analysis of lysine-acetylated peptides in P. asperata, Fragaria ananassa, Oryza sativa, and Arabidopsis thaliana. [file Table3.XLSX]

## Sheet: Annotation
Protein accession	Conserved species	Modified sequence	Position	Score	Mass error [ppm]	Charge	m/z	Subcellular Location	Biological Process	Cellular Component	Molecular Function	KEGG KO No.	KEGG Gene	KEGG pathway	IPR ID	Domain description
MA_101085g0010	Picea asperata, Fragaria ananassa, Oryza sativa	_TTILYK(ac)LK_	19	61.962	2.0052	2	511.318	cytosol	regulation of cellular process; single organism signaling; cellular response to stimulus; intracellular signal transduction; single-organism cellular process; single-organism process; organic substance transport; small GTPase mediated signal transduction; signaling; response to stimulus; protein transport; establishment of localization; establishment of protein localization; transport; signal tra…	cell; intracellular; cell part;	nucleoside phosphate binding; nucleoside binding; ion binding; nucleotide binding; organic cyclic compound binding; heterocyclic compound binding; ribonucleoside binding; carbohydrate derivative binding; ribonucleotide binding; binding; purine ribonucleoside binding; anion binding; purine ribonucleotide binding; purine nucleoside binding; guanyl ribonucleotide binding; guanyl nucleotide binding; …				IPR005225; IPR027417;
MA_10426264g0020	Picea asperata, Fragaria ananassa	_EVGLTFHLLK(ac)DVPGLISK_	274	54.355	0.67333	3	670.054	cytosol	biosynthetic process; metabolic process;		transferase activity, transferring acyl groups; transferase activity, transferring acyl groups other than amino-acyl groups; catalytic activity; transferase activity;	K00660	CHS; chalcone synthase [EC:2.3.1.74]	ath04712 Circadian rhythm - plant - Arabidopsis thaliana (thale cress); ath01100 Metabolic pathways - Arabidopsis thaliana (thale cress); ath00941 Flavonoid biosynthesis - Arabidopsis thaliana (thale cress); ath01110 Biosynthesis of secondary metabolites - Arabidopsis thaliana (thale cress);	IPR001099; IPR016039; IPR012328;	Chalcone/stilbene synthase, N-terminal; Thiolase-like; Chalcone/stilbene synthase, C-terminal;
MA_10426264g0020	Picea asperata, Fragaria ananassa	_DVPGLISK(ac)NIEK_	282	52.891	-0.98044	2	677.882	cytosol	biosynthetic process; metabolic process;		transferase activity, transferring acyl groups; transferase activity, transferring acyl groups other than amino-acyl groups; catalytic activity; transferase activity;	K00660	CHS; chalcone synthase [EC:2.3.1.74]	ath04712 Circadian rhythm - plant - Arabidopsis thaliana (thale cress); ath01100 Metabolic pathways - Arabidopsis thaliana (thale cress); ath00941 Flavonoid biosynthesis - Arabidopsis thaliana (thale cress); ath01110 Biosynthesis of secondary metabolites - Arabidopsis thaliana (thale cress);	IPR001099; IPR016039; IPR012328;	Chalcone/stilbene synthase, N-terminal; Thiolase-like; Chalcone/stilbene synthase, C-terminal;
MA_10427039g0010	Picea asperata, Fragaria ananassa	_YEIHHK(ac)LR_	493	105.14	1.0091	3	379.877	cytosol	metabolic process; protein metabolic process; macromolecule metabolic process; primary metabolic process; organic substance metabolic process;		ATP binding; nucleoside phosphate binding; nucleoside binding; ion binding; protein binding; nucleotide binding; organic cyclic compound binding; heterocyclic compound binding; ribonucleoside binding; carbohydrate derivative binding; ribonucleotide binding; binding; purine ribonucleoside binding; anion binding; purine ribonucleotide binding; adenyl ribonucleotide binding; adenyl nucleotide bindin…	K03696			IPR019489; IPR003593; IPR023150; IPR003959; IPR027417; IPR001943; IPR004176;	Clp ATPase, C-terminal; AAA+ ATPase domain; Double Clp-N motif; ATPase, AAA-type, core; P-loop containing nucleoside triphosphate hydrolase; UVR domain; Clp, N-terminal;
MA_10427364g0010	Picea asperata, Fragaria ananassa, Oryza sativa	_IILDK(ac)HEDTMSK_	713	89.663	-0.11714	2	736.377	cytosol, nuclear	regulation of biological process; regulation of primary metabolic process; regulation of macromolecule metabolic process; regulation of protein metabolic process; regulation of catabolic process; regulation of metabolic process; regulation of protein catabolic process; biological regulation;	proteasome complex; cell part; intracellular; macromolecular complex; intracellular part; protein complex; cell;	enzyme regulator activity; molecular function regulator; binding;	K03032	PSMD1; 26S proteasome regulatory subunit N2	ath03050 Proteasome - Arabidopsis thaliana (thale cress);	IPR011989; IPR016024;	Armadillo-like helical; Armadillo-type fold;
MA_10427661g0030	Picea asperata, Fragaria ananassa, Oryza sativa	_GILTLK(ac)YPIEHGIVSNWDDMEK_	53	75.773	0.3357	3	867.44	cytosol
MA_10427661g0030	Picea asperata, Fragaria ananassa	_DLTDALMK(ac)ILTER_	176	186.51	3.0159	2	780.919	cytosol
MA_10427947g0020	Picea asperata, Fragaria ananassa	_YFPTQALNFAFK(ac)DYFK_	204	82.59	0.73497	2	1021.51	cytosol	transport; transmembrane transport; single-organism localization; single-organism cellular process; single-organism process; localization; cellular process; single-organism transport; establishment of localization;	membrane; intracellular organelle; mitochondrial part; organelle membrane; organelle envelope; intracellular organelle part; cytoplasm; intracellular part; cell; organelle part; mitochondrion; mitochondrial envelope; intracellular membrane-bounded organelle; organelle; cell part; intracellular; envelope; organelle inner membrane; membrane-bounded organelle; mitochondrial inner membrane; mitochond…	transporter activity;	K05863			IPR023395;	Mitochondrial carrier domain;
MA_10427947g0020	Picea asperata, Fragaria ananassa, Oryza sativa	_MMMTSGEAVK(ac)YK_	361	88.021	-2.1197	2	709.33	cytosol	transport; transmembrane transport; single-organism localization; single-organism cellular process; single-organism process; localization; cellular process; single-organism transport; establishment of localization;	membrane; intracellular organelle; mitochondrial part; organelle membrane; organelle envelope; intracellular organelle part; cytoplasm; intracellular part; cell; organelle part; mitochondrion; mitochondrial envelope; intracellular membrane-bounded organelle; organelle; cell part; intracellular; envelope; organelle inner membrane; membrane-bounded organelle; mitochondrial inner membrane; mitochond…	transporter activity;	K05863			IPR023395;	Mitochondrial carrier domain;
MA_10428568g0010	Picea asperata, Fragaria ananassa, Oryza sativa	_LAK(ac)YNQLLR_	407	122.19	-4.1035	2	580.843	cytosol	single-organism carbohydrate catabolic process; glycolytic process; single-organism catabolic process; small molecule metabolic process; single-organism cellular process; single-organism process; carbohydrate metabolic process; primary metabolic process; cellular metabolic process; organic substance metabolic process; carbohydrate catabolic process; single-organism carbohydrate metabolic process;…	catalytic complex; cell part; intracellular; cytoplasm; macromolecular complex; intracellular part; cytosolic part; cell; cytosol; protein complex; phosphopyruvate hydratase complex; cytoplasmic part;	magnesium ion binding; phosphopyruvate hydratase activity; catalytic activity; binding; ion binding; metal ion binding; cation binding; lyase activity; hydro-lyase activity; carbon-oxygen lyase activity;	K01689	ENO; enolase [EC:4.2.1.11]	ath01230 Biosynthesis of amino acids - Arabidopsis thaliana (thale cress); ath03018 RNA degradation - Arabidopsis thaliana (thale cress); ath01200 Carbon metabolism - Arabidopsis thaliana (thale cress); ath01100 Metabolic pathways - Arabidopsis thaliana (thale cress); ath00010 Glycolysis / Gluconeogenesis - Arabidopsis thaliana (thale cress); ath01110 Biosynthesis of secondary metabolites - Arabi…	IPR029065; IPR020810; IPR029017; IPR020811;	Enolase C-terminal domain-like; Enolase, C-terminal; Enolase N-terminal domain-like; Enolase, N-terminal;
MA_10430522g0010	Picea asperata, Fragaria ananassa	_VVLIGDSGVGK(ac)SNLLSR_	25	84.375	-4.219	2	878.502	cytosol	regulation of cellular process; single organism signaling; intracellular transport; cellular response to stimulus; intracellular signal transduction; single-organism cellular process; single-organism process; nuclear transport; organic substance transport; small GTPase mediated signal transduction; signaling; response to stimulus; protein transport; establishment of localization; cellular localiz…	membrane; cell; intracellular; cell part;	nucleoside phosphate binding; nucleoside binding; ion binding; hydrolase activity, acting on acid anhydrides; hydrolase activity; nucleotide binding; nucleoside-triphosphatase activity; organic cyclic compound binding; heterocyclic compound binding; ribonucleoside binding; carbohydrate derivative binding; pyrophosphatase activity; catalytic activity; ribonucleotide binding; binding; purine ribonu…	K07904	RAB11A; Ras-related protein Rab-11A	ath04144 Endocytosis - Arabidopsis thaliana (thale cress);	IPR005225; IPR027417;	Small GTP-binding protein domain; P-loop containing nucleoside triphosphate hydrolase;
MA_10431009g0010	Picea asperata, Fragaria ananassa	_K(ac)LFGVTTLDVVR_	237	107.53	-1.2697	2	695.409	mitochondria	dicarboxylic acid metabolic process; oxidation-reduction process; small molecule metabolic process; single-organism cellular process; single-organism process; primary metabolic process; carbohydrate metabolic process; cellular metabolic process; organic substance metabolic process; metabolic process; single-organism metabolic process; malate metabolic process; carboxylic acid metabolic process; o…		oxidoreductase activity, acting on CH-OH group of donors; oxidoreductase activity, acting on the CH-OH group of donors, NAD or NADP as acceptor; malate dehydrogenase activity; catalytic activity; L-malate dehydrogenase activity; oxidoreductase activity;	K00026	MDH2; malate dehydrogenase [EC:1.1.1.37]	ath00620 Pyruvate metabolism - Arabidopsis thaliana (thale cress); ath01100 Metabolic pathways - Arabidopsis thaliana (thale cress); ath00020 Citrate cycle (TCA cycle) - Arabidopsis thaliana (thale cress); ath01200 Carbon metabolism - Arabidopsis thaliana (thale cress); ath00270 Cysteine and methionine metabolism - Arabidopsis thaliana (thale cress); ath00630 Glyoxylate and dicarboxylate metaboli…	IPR022383; IPR016040; IPR001236; IPR015955;	Lactate/malate dehydrogenase, C-terminal; NAD(P)-binding domain; Lactate/malate dehydrogenase, N-terminal; Lactate dehydrogenase/glycoside hydrolase, family 4, C-terminal;
MA_10432758g0010	Picea asperata, Fragaria ananassa, Oryza sativa	_FIDTSSK(ac)FGHGR_	368	56.936	0.51051	3	465.233	cytosol	cellular protein metabolic process; biosynthetic process; primary metabolic process; cellular metabolic process; organic substance biosynthetic process; cellular biosynthetic process; organic substance metabolic process; metabolic process; cellular macromolecule biosynthetic process; cellular macromolecule metabolic process; gene expression; macromolecule metabolic process; protein metabolic proc…	ribosome; organelle; intracellular organelle; intracellular non-membrane-bounded organelle; cell part; intracellular; cytoplasm; macromolecular complex; intracellular part; cell; ribonucleoprotein complex; cytoplasmic part; non-membrane-bounded organelle;	structural constituent of ribosome; structural molecule activity;	K02925	RP-L3e; large subunit ribosomal protein L3e	ath03010 Ribosome - Arabidopsis thaliana (thale cress);	IPR009000;	Translation protein, beta-barrel domain;
MA_10432758g0010	Picea asperata, Oryza sativa	_QSLLK(ac)QTSR_	348	183.67	-0.87341	2	551.814	cytosol	cellular protein metabolic process; biosynthetic process; primary metabolic process; cellular metabolic process; organic substance biosynthetic process; cellular biosynthetic process; organic substance metabolic process; metabolic process; cellular macromolecule biosynthetic process; cellular macromolecule metabolic process; gene expression; macromolecule metabolic process; protein metabolic proc…	ribosome; organelle; intracellular organelle; intracellular non-membrane-bounded organelle; cell part; intracellular; cytoplasm; macromolecular complex; intracellular part; cell; ribonucleoprotein complex; cytoplasmic part; non-membrane-bounded organelle;	structural constituent of ribosome; structural molecule activity;	K02925	RP-L3e; large subunit ribosomal protein L3e	ath03010 Ribosome - Arabidopsis thaliana (thale cress);	IPR009000;	Translation protein, beta-barrel domain;
MA_10433454g0020	Picea asperata, Fragaria ananassa, Oryza sativa	_SK(ac)FDNLYGCR_	225	131.82	0.89208	2	651.301	cytosol	metabolic process; one-carbon metabolic process; single-organism metabolic process; small molecule metabolic process; single-organism cellular process; single-organism process; cellular process; cellular metabolic process;		adenosylhomocysteinase activity; hydrolase activity; hydrolase activity, acting on ether bonds; catalytic activity; trialkylsulfonium hydrolase activity;	K01251	E3.3.1.1; adenosylhomocysteinase [EC:3.3.1.1]	ath00270 Cysteine and methionine metabolism - Arabidopsis thaliana (thale cress); ath01100 Metabolic pathways - Arabidopsis thaliana (thale cress);	IPR016040; IPR015878;	NAD(P)-binding domain; S-adenosyl-L-homocysteine hydrolase, NAD binding domain;
MA_10433454g0020	Picea asperata, Fragaria ananassa, Oryza sativa	_VYVLPK(ac)HLDEK_	429	89.805	-0.49537	3	461.594	cytosol	metabolic process; one-carbon metabolic process; single-organism metabolic process; small molecule metabolic process; single-organism cellular process; single-organism process; cellular process; cellular metabolic process;		adenosylhomocysteinase activity; hydrolase activity; hydrolase activity, acting on ether bonds; catalytic activity; trialkylsulfonium hydrolase activity;	K01251	E3.3.1.1; adenosylhomocysteinase [EC:3.3.1.1]	ath00270 Cysteine and methionine metabolism - Arabidopsis thaliana (thale cress); ath01100 Metabolic pathways - Arabidopsis thaliana (thale cress);	IPR016040; IPR015878;	NAD(P)-binding domain; S-adenosyl-L-homocysteine hydrolase, NAD binding domain;
MA_10433855g0010	Picea asperata, Fragaria ananassa	_GQGK(ac)SFQCELVFAK_	174	63.29	-1.3549	2	820.909	mitochondria			ATP binding; nucleoside phosphate binding; nucleoside binding; ion binding; nucleotide binding; organic cyclic compound binding; heterocyclic compound binding; ribonucleoside binding; carbohydrate derivative binding; ribonucleotide binding; binding; purine ribonucleoside binding; anion binding; purine ribonucleotide binding; adenyl ribonucleotide binding; adenyl nucleotide binding; purine nucleos…				IPR003959; IPR027417;	ATPase, AAA-type, core; P-loop containing nucleoside triphosphate hydrolase;
MA_10433855g0010	Picea asperata, Fragaria ananassa	_MEK(ac)FYWAPTR_	305	98.898	-0.085657	2	685.832	mitochondria			ATP binding; nucleoside phosphate binding; nucleoside binding; ion binding; nucleotide binding; organic cyclic compound binding; heterocyclic compound binding; ribonucleoside binding; carbohydrate derivative binding; ribonucleotide binding; binding; purine ribonucleoside binding; anion binding; purine ribonucleotide binding; adenyl ribonucleotide binding; adenyl nucleotide binding; purine nucleos…				IPR003959; IPR027417;	ATPase, AAA-type, core; P-loop containing nucleoside triphosphate hydrolase;
MA_10435961g0030	Picea asperata, Fragaria ananassa, Oryza sativa	_GK(ac)FDESR_	253	117.16	0.32071	2	440.712	cytosol				K00208	fabI; enoyl-[acyl-carrier protein] reductase I [EC:1.3.1.9 1.3.1.10]	ath00061 Fatty acid biosynthesis - Arabidopsis thaliana (thale cress); ath01212 Fatty acid metabolism - Arabidopsis thaliana (thale cress); ath01100 Metabolic pathways - Arabidopsis thaliana (thale cress); ath00780 Biotin metabolism - Arabidopsis thaliana (thale cress);	IPR016040;	NAD(P)-binding domain;
MA_10436259g0020	Picea asperata, Fragaria ananassa, Oryza sativa	_ILFDK(ac)YHPGYFGK_	47	98.942	-1.3141	2	813.919	cytosol	cellular protein metabolic process; biosynthetic process; primary metabolic process; cellular metabolic process; organic substance biosynthetic process; cellular biosynthetic process; organic substance metabolic process; metabolic process; cellular macromolecule biosynthetic process; cellular macromolecule metabolic process; gene expression; macromolecule metabolic process; protein metabolic proc…	ribosome; intracellular organelle; intracellular non-membrane-bounded organelle; intracellular organelle part; cytoplasm; macromolecular complex; intracellular part; cell; organelle part; non-membrane-bounded organelle; organelle; large ribosomal subunit; intracellular; cell part; ribosomal subunit; ribonucleoprotein complex; cytoplasmic part;	structural constituent of ribosome; structural molecule activity;	K02900	RP-L27Ae; large subunit ribosomal protein L27Ae	ath03010 Ribosome - Arabidopsis thaliana (thale cress);	IPR021131;	Ribosomal protein L18e/L15P;
MA_10436511g0010	Picea asperata, Fragaria ananassa	_TIK(ac)FYTECLGMK_	21	92.19	-1.9257	2	766.878	cytosol			lactoylglutathione lyase activity; metal ion binding; cation binding; lyase activity; carbon-sulfur lyase activity; catalytic activity; binding; ion binding;	K01759	GLO1; lactoylglutathione lyase [EC:4.4.1.5]	ath00620 Pyruvate metabolism - Arabidopsis thaliana (thale cress);	IPR029068; IPR004360;	Glyoxalase/Bleomycin resistance protein/Dihydroxybiphenyl dioxygenase; Glyoxalase/fosfomycin resistance/dioxygenase domain;
MA_10437148g0010	Picea asperata, Fragaria ananassa	_GFAVK(ac)FYTR_	125	78.939	-0.68064	2	565.803	cytosol	metabolic process; response to stress; oxidation-reduction process; single-organism metabolic process; response to oxidative stress; single-organism process; response to stimulus;		organic cyclic compound binding; heterocyclic compound binding; heme binding; catalytic activity; binding; antioxidant activity; catalase activity; peroxidase activity; tetrapyrrole binding; oxidoreductase activity; oxidoreductase activity, acting on peroxide as acceptor;	K03781	katE; catalase [EC:1.11.1.6]	ath04146 Peroxisome - Arabidopsis thaliana (thale cress); ath00380 Tryptophan metabolism - Arabidopsis thaliana (thale cress); ath01200 Carbon metabolism - Arabidopsis thaliana (thale cress); ath00630 Glyoxylate and dicarboxylate metabolism - Arabidopsis thaliana (thale cress); ath01110 Biosynthesis of secondary metabolites - Arabidopsis thaliana (thale cress);	IPR020835; IPR011614; IPR010582;	Catalase-like domain; Catalase core domain; Catalase immune-responsive domain;
MA_112104g0010	Picea asperata, Fragaria ananassa, Oryza sativa	_TWEK(ac)LQLAAR_	57	137.95	-2.0062	2	629.351	cytosol	cellular protein metabolic process; biosynthetic process; primary metabolic process; cellular metabolic process; organic substance biosynthetic process; cellular biosynthetic process; organic substance metabolic process; metabolic process; cellular macromolecule biosynthetic process; cellular macromolecule metabolic process; gene expression; macromolecule metabolic process; protein metabolic proc…	ribosome; intracellular organelle; intracellular non-membrane-bounded organelle; small ribosomal subunit; intracellular organelle part; cytoplasm; macromolecular complex; intracellular part; cell; organelle part; non-membrane-bounded organelle; organelle; ribosomal subunit; intracellular; cell part; ribonucleoprotein complex; cytoplasmic part;	structural constituent of ribosome; structural molecule activity;	K02998	RP-SAe; small subunit ribosomal protein SAe	ath03010 Ribosome - Arabidopsis thaliana (thale cress);	IPR023591;	Ribosomal protein S2, flavodoxin-like domain;
MA_112104g0010	Picea asperata, Oryza sativa	_AVLK(ac)FAQYTGAHAIAGR_	89	88.311	-0.17583	3	606	cytosol	cellular protein metabolic process; biosynthetic process; primary metabolic process; cellular metabolic process; organic substance biosynthetic process; cellular biosynthetic process; organic substance metabolic process; metabolic process; cellular macromolecule biosynthetic process; cellular macromolecule metabolic process; gene expression; macromolecule metabolic process; protein metabolic proc…	ribosome; intracellular organelle; intracellular non-membrane-bounded organelle; small ribosomal subunit; intracellular organelle part; cytoplasm; macromolecular complex; intracellular part; cell; organelle part; non-membrane-bounded organelle; organelle; ribosomal subunit; intracellular; cell part; ribonucleoprotein complex; cytoplasmic part;	structural constituent of ribosome; structural molecule activity;	K02998	RP-SAe; small subunit ribosomal protein SAe	ath03010 Ribosome - Arabidopsis thaliana (thale cress);	IPR023591;	Ribosomal protein S2, flavodoxin-like domain;
MA_12191g0010	Picea asperata, Fragaria ananassa	_YHSTK(ac)SGDEMTSLK_	445	43.69	0.78139	3	542.587	cytosol	protein folding; metabolic process; response to stress; cellular protein metabolic process; cellular macromolecule metabolic process; macromolecule metabolic process; protein metabolic process; response to stimulus; primary metabolic process; cellular process; cellular metabolic process; organic substance metabolic process;		ATP binding; nucleoside phosphate binding; nucleoside binding; ion binding; protein binding; nucleotide binding; organic cyclic compound binding; heterocyclic compound binding; ribonucleoside binding; carbohydrate derivative binding; ribonucleotide binding; binding; purine ribonucleoside binding; anion binding; purine ribonucleotide binding; unfolded protein binding; adenyl ribonucleotide binding…	K04079	htpG; molecular chaperone HtpG	ath04141 Protein processing in endoplasmic reticulum - Arabidopsis thaliana (thale cress); ath04626 Plant-pathogen interaction - Arabidopsis thaliana (thale cress);	IPR020575; IPR020568; IPR003594;	Heat shock protein Hsp90, N-terminal; Ribosomal protein S5 domain 2-type fold; Histidine kinase-like ATPase, C-terminal domain;
MA_14388g0010	Picea asperata, Fragaria ananassa	_FK(ac)AFDLGGHQIAR_	61	104.59	2.496	3	501.269	cytoskeleton	regulation of cellular process; single organism signaling; cellular response to stimulus; intracellular transport; intracellular signal transduction; single-organism cellular process; single-organism process; organic substance transport; small GTPase mediated signal transduction; signaling; response to stimulus; protein transport; establishment of localization; cellular localization; transport; e…	cell; intracellular; cell part;	nucleoside phosphate binding; nucleoside binding; ion binding; nucleotide binding; organic cyclic compound binding; heterocyclic compound binding; ribonucleoside binding; carbohydrate derivative binding; ribonucleotide binding; binding; purine ribonucleoside binding; anion binding; purine ribonucleotide binding; purine nucleoside binding; guanyl ribonucleotide binding; guanyl nucleotide binding; …				IPR027417;	P-loop containing nucleoside triphosphate hydrolase;
MA_15508g0010	Picea asperata, Fragaria ananassa	_HK(ac)EHISAYGEGNER_	283	89.624	1.8491	3	556.929	cytoskeleton	glutamine family amino acid metabolic process; cellular amino acid biosynthetic process; glutamine biosynthetic process; organic acid biosynthetic process; single-organism biosynthetic process; small molecule metabolic process; glutamine metabolic process; single-organism cellular process; single-organism process; nitrogen compound metabolic process; biosynthetic process; alpha-amino acid metabol…		ligase activity, forming carbon-nitrogen bonds; ammonia ligase activity; glutamate-ammonia ligase activity; acid-ammonia (or amide) ligase activity; catalytic activity; ligase activity;	K01915	glnA; glutamine synthetase [EC:6.3.1.2]	ath00250 Alanine, aspartate and glutamate metabolism - Arabidopsis thaliana (thale cress); ath01230 Biosynthesis of amino acids - Arabidopsis thaliana (thale cress); ath00220 Arginine biosynthesis - Arabidopsis thaliana (thale cress); ath00910 Nitrogen metabolism - Arabidopsis thaliana (thale cress); ath01100 Metabolic pathways - Arabidopsis thaliana (thale cress); ath00630 Glyoxylate and dicarbo…	IPR008146; IPR008147; IPR014746;	Glutamine synthetase, catalytic domain; Glutamine synthetase, beta-Grasp domain; Glutamine synthetase/guanido kinase, catalytic domain;
MA_1839g0010	Picea asperata, Fragaria ananassa, Oryza sativa	_LPTK(ac)ILWMR_	92	98.044	-1.9221	2	600.352	cytosol	cellular protein metabolic process; biosynthetic process; primary metabolic process; cellular metabolic process; organic substance biosynthetic process; cellular biosynthetic process; organic substance metabolic process; metabolic process; cellular macromolecule biosynthetic process; cellular macromolecule metabolic process; gene expression; macromolecule metabolic process; protein metabolic proc…	ribosome; organelle; intracellular organelle; intracellular non-membrane-bounded organelle; cell part; intracellular; cytoplasm; macromolecular complex; intracellular part; cell; ribonucleoprotein complex; cytoplasmic part; non-membrane-bounded organelle;	structural constituent of ribosome; structural molecule activity;	K02885	RP-L19e; large subunit ribosomal protein L19e	ath03010 Ribosome - Arabidopsis thaliana (thale cress);	IPR000196; IPR015974; IPR015972;	Ribosomal protein L19/L19e domain; Ribosomal protein L19/L19e, domain 3; Ribosomal protein L19/L19e, domain 1;
MA_1839g0010	Picea asperata, Oryza sativa	_IDK(ac)HMYHDMYMK_	117	40.88	-1.1747	3	551.912	cytosol	cellular protein metabolic process; biosynthetic process; primary metabolic process; cellular metabolic process; organic substance biosynthetic process; cellular biosynthetic process; organic substance metabolic process; metabolic process; cellular macromolecule biosynthetic process; cellular macromolecule metabolic process; gene expression; macromolecule metabolic process; protein metabolic proc…	ribosome; organelle; intracellular organelle; intracellular non-membrane-bounded organelle; cell part; intracellular; cytoplasm; macromolecular complex; intracellular part; cell; ribonucleoprotein complex; cytoplasmic part; non-membrane-bounded organelle;	structural constituent of ribosome; structural molecule activity;	K02885	RP-L19e; large subunit ribosomal protein L19e	ath03010 Ribosome - Arabidopsis thaliana (thale cress);	IPR000196; IPR015974; IPR015972;	Ribosomal protein L19/L19e domain; Ribosomal protein L19/L19e, domain 3; Ribosomal protein L19/L19e, domain 1;
MA_210354g0010	Picea asperata, Fragaria ananassa	_K(ac)QLATK(ac)AAR_	19	147.75	-3.1445	2	535.819	nuclear		intracellular organelle; intracellular non-membrane-bounded organelle; intracellular organelle part; macromolecular complex; intracellular part; cell; organelle part; DNA bending complex; chromosomal part; nucleosome; non-membrane-bounded organelle; organelle; chromatin; cell part; intracellular; chromosome; protein complex; protein-DNA complex; DNA packaging complex;	organic cyclic compound binding; heterocyclic compound binding; DNA binding; protein heterodimerization activity; binding; protein dimerization activity; nucleic acid binding; protein binding;	K11253			IPR009072; IPR007125;	Histone-fold; Histone H2A/H2B/H3;
MA_210354g0010	Picea asperata, Arabidopsis thaliana	K(ac)SAPATGGVK	28	66.56	-0.33697	2	479.272	nuclear		intracellular organelle; intracellular non-membrane-bounded organelle; intracellular organelle part; macromolecular complex; intracellular part; cell; organelle part; DNA bending complex; chromosomal part; nucleosome; non-membrane-bounded organelle; organelle; chromatin; cell part; intracellular; chromosome; protein complex; protein-DNA complex; DNA packaging complex;	organic cyclic compound binding; heterocyclic compound binding; DNA binding; protein heterodimerization activity; binding; protein dimerization activity; nucleic acid binding; protein binding;	K11253			IPR009072; IPR007125;	Histone-fold; Histone H2A/H2B/H3;
MA_210354g0010	Picea asperata, Arabidopsis thaliana	K(ac)STGGK(ac)APR	10	135.55	-1.0455	2	493.275	nuclear		intracellular organelle; intracellular non-membrane-bounded organelle; intracellular organelle part; macromolecular complex; intracellular part; cell; organelle part; DNA bending complex; chromosomal part; nucleosome; non-membrane-bounded organelle; organelle; chromatin; cell part; intracellular; chromosome; protein complex; protein-DNA complex; DNA packaging complex;	organic cyclic compound binding; heterocyclic compound binding; DNA binding; protein heterodimerization activity; binding; protein dimerization activity; nucleic acid binding; protein binding;	K11253			IPR009072; IPR007125;	Histone-fold; Histone H2A/H2B/H3;	K(ac)STGGK(ac)APK
MA_210354g0010	Picea asperata, Arabidopsis thaliana	K(ac)STGGK(ac)APR	15	135.55	-1.0455	2	493.275	nuclear		intracellular organelle; intracellular non-membrane-bounded organelle; intracellular organelle part; macromolecular complex; intracellular part; cell; organelle part; DNA bending complex; chromosomal part; nucleosome; non-membrane-bounded organelle; organelle; chromatin; cell part; intracellular; chromosome; protein complex; protein-DNA complex; DNA packaging complex;	organic cyclic compound binding; heterocyclic compound binding; DNA binding; protein heterodimerization activity; binding; protein dimerization activity; nucleic acid binding; protein binding;	K11253			IPR009072; IPR007125;	Histone-fold; Histone H2A/H2B/H3;	K(ac)STGGK(ac)APK
MA_434977g0010	Picea asperata, Fragaria ananassa, Oryza sativa	_MDATTPK(ac)YSK_	113	96.229	0.16324	2	592.287	cytosol	translational elongation; cellular protein metabolic process; biosynthetic process; primary metabolic process; cellular metabolic process; organic substance biosynthetic process; cellular biosynthetic process; organic substance metabolic process; metabolic process; cellular macromolecule biosynthetic process; cellular macromolecule metabolic process; gene expression; macromolecule metabolic proce…	intracellular part; cell; cell part; intracellular; cytoplasm;	RNA binding; nucleoside phosphate binding; translation elongation factor activity; nucleoside binding; ion binding; hydrolase activity, acting on acid anhydrides; hydrolase activity; nucleotide binding; nucleoside-triphosphatase activity; heterocyclic compound binding; organic cyclic compound binding; translation factor activity, nucleic acid binding; ribonucleoside binding; carbohydrate derivati…	K03231	EEF1A; elongation factor 1-alpha	ath03013 RNA transport - Arabidopsis thaliana (thale cress);	IPR004160; IPR004161; IPR009001; IPR027417; IPR000795; IPR009000;	Translation elongation factor EFTu/EF1A, C-terminal; Translation elongation factor EFTu/EF1A, domain 2; Translation elongation factor EF1A/initiation factor IF2gamma, C-terminal; P-loop containing nucleoside triphosphate hydrolase; Transcription factor, GTP-binding domain; Translation protein, beta-barrel domain;
MA_434977g0010	Picea asperata, Fragaria ananassa, Oryza sativa	_LPLQDVYK(ac)IGGIGTVPVGR_	195	126.43	-2.0772	3	675.389	cytosol	translational elongation; cellular protein metabolic process; biosynthetic process; primary metabolic process; cellular metabolic process; organic substance biosynthetic process; cellular biosynthetic process; organic substance metabolic process; metabolic process; cellular macromolecule biosynthetic process; cellular macromolecule metabolic process; gene expression; macromolecule metabolic proce…	intracellular part; cell; cell part; intracellular; cytoplasm;	RNA binding; nucleoside phosphate binding; translation elongation factor activity; nucleoside binding; ion binding; hydrolase activity, acting on acid anhydrides; hydrolase activity; nucleotide binding; nucleoside-triphosphatase activity; heterocyclic compound binding; organic cyclic compound binding; translation factor activity, nucleic acid binding; ribonucleoside binding; carbohydrate derivati…	K03231	EEF1A; elongation factor 1-alpha	ath03013 RNA transport - Arabidopsis thaliana (thale cress);	IPR004160; IPR004161; IPR009001; IPR027417; IPR000795; IPR009000;	Translation elongation factor EFTu/EF1A, C-terminal; Translation elongation factor EFTu/EF1A, domain 2; Translation elongation factor EF1A/initiation factor IF2gamma, C-terminal; P-loop containing nucleoside triphosphate hydrolase; Transcription factor, GTP-binding domain; Translation protein, beta-barrel domain;
MA_45916g0010	Picea asperata, Fragaria ananassa	_LYSNTK(ac)TNFR_	289	175.93	-1.0679	2	643.33	cytosol	translational elongation; cellular protein metabolic process; biosynthetic process; primary metabolic process; cellular metabolic process; organic substance biosynthetic process; cellular biosynthetic process; organic substance metabolic process; metabolic process; cellular macromolecule biosynthetic process; cellular macromolecule metabolic process; gene expression; macromolecule metabolic proce…		organic cyclic compound binding; heterocyclic compound binding; RNA binding; translation factor activity, nucleic acid binding; protein binding; translation elongation factor activity; binding; nucleic acid binding;	K03233			IPR004046; IPR010987; IPR001662; IPR012336; IPR004045;	Glutathione S-transferase, C-terminal; Glutathione S-transferase, C-terminal-like; Translation elongation factor EF1B, gamma chain, conserved; Thioredoxin-like fold; Glutathione S-transferase, N-terminal;
MA_50378g0010	Picea asperata, Fragaria ananassa, Oryza sativa	_GIYAYGFEK(ac)PSAIQQR_	62	121.99	-0.82395	2	935.478	nuclear			ATP binding; nucleoside phosphate binding; nucleoside binding; ion binding; nucleotide binding; organic cyclic compound binding; heterocyclic compound binding; ribonucleoside binding; carbohydrate derivative binding; ribonucleotide binding; binding; nucleic acid binding; purine ribonucleoside binding; anion binding; purine ribonucleotide binding; adenyl ribonucleotide binding; adenyl nucleotide b…	K03257	EIF4A; translation initiation factor 4A	ath03013 RNA transport - Arabidopsis thaliana (thale cress);	IPR014014; IPR011545; IPR014001; IPR027417; IPR001650;	RNA helicase, DEAD-box type, Q motif; DEAD/DEAH box helicase domain; Helicase superfamily 1/2, ATP-binding domain; P-loop containing nucleoside triphosphate hydrolase; Helicase, C-terminal;
MA_50378g0010	Picea asperata, Oryza sativa	_ELAQQIEK(ac)VMR_	126	115.33	1.3452	2	693.874	nuclear			ATP binding; nucleoside phosphate binding; nucleoside binding; ion binding; nucleotide binding; organic cyclic compound binding; heterocyclic compound binding; ribonucleoside binding; carbohydrate derivative binding; ribonucleotide binding; binding; nucleic acid binding; purine ribonucleoside binding; anion binding; purine ribonucleotide binding; adenyl ribonucleotide binding; adenyl nucleotide b…	K03257	EIF4A; translation initiation factor 4A	ath03013 RNA transport - Arabidopsis thaliana (thale cress);	IPR014014; IPR011545; IPR014001; IPR027417; IPR001650;	RNA helicase, DEAD-box type, Q motif; DEAD/DEAH box helicase domain; Helicase superfamily 1/2, ATP-binding domain; P-loop containing nucleoside triphosphate hydrolase; Helicase, C-terminal;
MA_5287g0010	Picea asperata, Fragaria ananassa, Oryza sativa	_TIYCTNIDK(ac)K_	209	77.062	-1.8018	2	649.326	cytosol			organic cyclic compound binding; heterocyclic compound binding; nucleoside phosphate binding; binding; nucleic acid binding; nucleotide binding; small molecule binding;				IPR000504; IPR012677;	RNA recognition motif domain; Nucleotide-binding alpha-beta plait domain;
MA_529552g0010	Picea asperata, Fragaria ananassa, Oryza sativa	_MQIFVK(ac)TLTGK_	6	105.2	1.2684	2	654.373	nuclear	cellular protein metabolic process; biosynthetic process; primary metabolic process; cellular metabolic process; organic substance biosynthetic process; cellular biosynthetic process; organic substance metabolic process; metabolic process; cellular macromolecule biosynthetic process; cellular macromolecule metabolic process; gene expression; macromolecule metabolic process; protein metabolic proc…	ribosome; organelle; intracellular organelle; intracellular non-membrane-bounded organelle; cell part; intracellular; cytoplasm; macromolecular complex; intracellular part; cell; ribonucleoprotein complex; cytoplasmic part; non-membrane-bounded organelle;	protein binding; structural constituent of ribosome; structural molecule activity; binding;	K02977	RP-S27Ae; small subunit ribosomal protein S27Ae	ath03010 Ribosome - Arabidopsis thaliana (thale cress);	IPR002906; IPR011332; IPR029071; IPR000626;	Ribosomal protein S27a; Zinc-binding ribosomal protein; Ubiquitin-related domain; Ubiquitin domain;
MA_63231g0010	Picea asperata, Fragaria ananassa	_K(ac)TFAEEVNAAFR_	325	49.298	1.5997	2	712.862	mitochondria	glucose metabolic process; single-organism carbohydrate metabolic process; metabolic process; oxidation-reduction process; single-organism metabolic process; monosaccharide metabolic process; single-organism process; primary metabolic process; carbohydrate metabolic process; organic substance metabolic process; hexose metabolic process;		oxidoreductase activity, acting on the aldehyde or oxo group of donors, NAD or NADP as acceptor; organic cyclic compound binding; heterocyclic compound binding; nucleoside phosphate binding; NAD binding; catalytic activity; binding; oxidoreductase activity, acting on the aldehyde or oxo group of donors; NADP binding; nucleotide binding; cofactor binding; oxidoreductase activity; coenzyme binding;…	K05298	GAPA; glyceraldehyde-3-phosphate dehydrogenase (NADP+) (phosphorylating) [EC:1.2.1.13]	ath01200 Carbon metabolism - Arabidopsis thaliana (thale cress); ath01100 Metabolic pathways - Arabidopsis thaliana (thale cress); ath00710 Carbon fixation in photosynthetic organisms - Arabidopsis thaliana (thale cress);	IPR020829; IPR016040; IPR020828;	Glyceraldehyde 3-phosphate dehydrogenase, catalytic domain; NAD(P)-binding domain; Glyceraldehyde 3-phosphate dehydrogenase, NAD(P) binding domain;
MA_69667g0010	Picea asperata, Fragaria ananassa	_TEWLDGK(ac)HVVFGQVVEGLDVVK_	135	69.704	0.38006	3	832.776	cytosol	cellular protein metabolic process; protein peptidyl-prolyl isomerization; peptidyl-proline modification; primary metabolic process; cellular metabolic process; organic substance metabolic process; protein folding; peptidyl-amino acid modification; metabolic process; cellular macromolecule metabolic process; cellular protein modification process; protein metabolic process; macromolecule metabolic…		peptidyl-prolyl cis-trans isomerase activity; isomerase activity; catalytic activity; cis-trans isomerase activity;	K01802			IPR002130; IPR029000;	Cyclophilin-type peptidyl-prolyl cis-trans isomerase domain; Cyclophilin-like domain;
MA_70965g0010	Picea asperata, Fragaria ananassa, Oryza sativa	_YNTPK(ac)YR_	48	79.469	1.3711	2	492.251	cytosol	cellular protein metabolic process; biosynthetic process; primary metabolic process; cellular metabolic process; organic substance biosynthetic process; cellular biosynthetic process; organic substance metabolic process; metabolic process; cellular macromolecule biosynthetic process; cellular macromolecule metabolic process; gene expression; macromolecule metabolic process; protein metabolic proc…	ribosome; organelle; intracellular organelle; intracellular non-membrane-bounded organelle; cell part; intracellular; cytoplasm; macromolecular complex; intracellular part; cell; ribonucleoprotein complex; cytoplasmic part; non-membrane-bounded organelle;	organic cyclic compound binding; heterocyclic compound binding; RNA binding; 5S rRNA binding; binding; nucleic acid binding; structural constituent of ribosome; structural molecule activity; rRNA binding;	K02932	RP-L5e; large subunit ribosomal protein L5e	ath03010 Ribosome - Arabidopsis thaliana (thale cress);	IPR025607;	Ribosomal protein L5 eukaryotic/L18 archaeal, C-terminal;
MA_7469g0010	Picea asperata, Fragaria ananassa	_AVISK(ac)SFER_	892	93.649	-1.4142	2	539.798	mitochondria	metabolic process;			K01681	ACO; aconitate hydratase [EC:4.2.1.3]	ath01230 Biosynthesis of amino acids - Arabidopsis thaliana (thale cress); ath01200 Carbon metabolism - Arabidopsis thaliana (thale cress); ath01100 Metabolic pathways - Arabidopsis thaliana (thale cress); ath00020 Citrate cycle (TCA cycle) - Arabidopsis thaliana (thale cress); ath00630 Glyoxylate and dicarboxylate metabolism - Arabidopsis thaliana (thale cress); ath01210 2-Oxocarboxylic acid met…	IPR001030; IPR000573; IPR015932; IPR015928; IPR015931;	Aconitase/3-isopropylmalate dehydratase large subunit, alpha/beta/alpha domain; Aconitase A/isopropylmalate dehydratase small subunit, swivel domain; Aconitase/3-isopropylmalate dehydratase large subunit, alpha/beta/alpha, subdomain 2; Aconitase/3-isopropylmalate dehydratase, swivel; Aconitase/3-isopropylmalate dehydratase large subunit, alpha/beta/alpha, subdomain 1/3;
MA_77810g0010	Picea asperata, Fragaria ananassa	_TEIEK(ac)LK_	239	63.565	0.38932	2	451.763	cytosol	modification-dependent macromolecule catabolic process; proteolysis involved in cellular protein catabolic process; cellular macromolecule catabolic process; cellular protein catabolic process; modification-dependent protein catabolic process; cellular protein metabolic process; ubiquitin-dependent protein catabolic process; primary metabolic process; cellular metabolic process; organic substance…	proteasome core complex, alpha-subunit complex; proteasome complex; cell part; intracellular; proteasome core complex; macromolecular complex; intracellular part; cell; protein complex;	endopeptidase activity; threonine-type endopeptidase activity; peptidase activity; threonine-type peptidase activity; catalytic activity; peptidase activity, acting on L-amino acid peptides; hydrolase activity;	K02727	PSMA3; 20S proteasome subunit alpha 7 [EC:3.4.25.1]	ath03050 Proteasome - Arabidopsis thaliana (thale cress);	IPR000426; IPR029055;	Proteasome alpha-subunit, N-terminal domain; Nucleophile aminohydrolases, N-terminal;
MA_89717g0010	Picea asperata, Fragaria ananassa	_FGFYEFFK(ac)K_	169	70.028	-1.3806	2	627.813	cytosol				K15102			IPR023395;	Mitochondrial carrier domain;
MA_92421g0010	Picea asperata, Fragaria ananassa, Oryza sativa	_GVTPK(ac)YSLK_	207	126.56	-0.15673	2	517.798	nuclear	single-organism carbohydrate catabolic process; glycolytic process; single-organism catabolic process; small molecule metabolic process; single-organism cellular process; single-organism process; carbohydrate metabolic process; primary metabolic process; cellular metabolic process; organic substance metabolic process; carbohydrate catabolic process; single-organism carbohydrate metabolic process;…		phosphotransferase activity, carboxyl group as acceptor; kinase activity; catalytic activity; transferase activity; phosphoglycerate kinase activity; transferase activity, transferring phosphorus-containing groups;	K00927	PGK; phosphoglycerate kinase [EC:2.7.2.3]	ath01230 Biosynthesis of amino acids - Arabidopsis thaliana (thale cress); ath01200 Carbon metabolism - Arabidopsis thaliana (thale cress); ath01100 Metabolic pathways - Arabidopsis thaliana (thale cress); ath00710 Carbon fixation in photosynthetic organisms - Arabidopsis thaliana (thale cress); ath00010 Glycolysis / Gluconeogenesis - Arabidopsis thaliana (thale cress); ath01110 Biosynthesis of s…	IPR015824; IPR015901;	Phosphoglycerate kinase, N-terminal; Phosphoglycerate kinase, C-terminal;
MA_92421g0010	Picea asperata, Fragaria ananassa, Oryza sativa	_YSLK(ac)PLVPR_	211	107.69	1.1372	2	557.835	nuclear	single-organism carbohydrate catabolic process; glycolytic process; single-organism catabolic process; small molecule metabolic process; single-organism cellular process; single-organism process; carbohydrate metabolic process; primary metabolic process; cellular metabolic process; organic substance metabolic process; carbohydrate catabolic process; single-organism carbohydrate metabolic process;…		phosphotransferase activity, carboxyl group as acceptor; kinase activity; catalytic activity; transferase activity; phosphoglycerate kinase activity; transferase activity, transferring phosphorus-containing groups;	K00927	PGK; phosphoglycerate kinase [EC:2.7.2.3]	ath01230 Biosynthesis of amino acids - Arabidopsis thaliana (thale cress); ath01200 Carbon metabolism - Arabidopsis thaliana (thale cress); ath01100 Metabolic pathways - Arabidopsis thaliana (thale cress); ath00710 Carbon fixation in photosynthetic organisms - Arabidopsis thaliana (thale cress); ath00010 Glycolysis / Gluconeogenesis - Arabidopsis thaliana (thale cress); ath01110 Biosynthesis of s…	IPR015824; IPR015901;	Phosphoglycerate kinase, N-terminal; Phosphoglycerate kinase, C-terminal;
MA_98979g0010	Picea asperata, Fragaria ananassa	_EAGK(ac)TFDVCYEQLK_	66	67.136	-3.5072	2	865.409	cytosol	metabolic process;		isomerase activity; intramolecular oxidoreductase activity; triose-phosphate isomerase activity; catalytic activity; intramolecular oxidoreductase activity, interconverting aldoses and ketoses;	K01803	TPI; triosephosphate isomerase (TIM) [EC:5.3.1.1]	ath01230 Biosynthesis of amino acids - Arabidopsis thaliana (thale cress); ath00051 Fructose and mannose metabolism - Arabidopsis thaliana (thale cress); ath01100 Metabolic pathways - Arabidopsis thaliana (thale cress); ath00562 Inositol phosphate metabolism - Arabidopsis thaliana (thale cress); ath00010 Glycolysis / Gluconeogenesis - Arabidopsis thaliana (thale cress); ath01200 Carbon metabolism…	IPR013785;	Aldolase-type TIM barrel;
MA_99733g0010	Picea asperata, Fragaria ananassa	_DFLLK(ac)PELLR_	171	106.35	-0.99638	2	643.379	mitochondria			ATP binding; nucleoside phosphate binding; nucleoside binding; ion binding; nucleotide binding; organic cyclic compound binding; heterocyclic compound binding; ribonucleoside binding; carbohydrate derivative binding; ribonucleotide binding; binding; nucleic acid binding; purine ribonucleoside binding; anion binding; purine ribonucleotide binding; adenyl ribonucleotide binding; adenyl nucleotide b…	K12812			IPR011545; IPR014014; IPR014001; IPR027417; IPR001650;	DEAD/DEAH box helicase domain; RNA helicase, DEAD-box type, Q motif; Helicase superfamily 1/2, ATP-binding domain; P-loop containing nucleoside triphosphate hydrolase; Helicase, C-terminal;
MA_10090g0010	Picea asperata, Oryza sativa	_RELK(ac)FALESFWDGK_	18	179.67	-1.3096	2	884.457	cytosol	sulfur amino acid biosynthetic process; organic acid biosynthetic process; aspartate family amino acid metabolic process; single-organism process; biosynthetic process; organonitrogen compound biosynthetic process; cellular metabolic process; sulfur amino acid metabolic process; sulfur compound biosynthetic process; methionine biosynthetic process; organic substance metabolic process; metabolic p…		5-methyltetrahydropteroyltri-L-glutamate-dependent methyltransferase activity; methyltransferase activity; transition metal ion binding; catalytic activity; binding; S-methyltransferase activity; ion binding; transferase activity, transferring one-carbon groups; metal ion binding; cation binding; zinc ion binding; transferase activity; 5-methyltetrahydropteroyltriglutamate-homocysteine S-methyltr…				IPR013215; IPR002629;	Cobalamin-independent methionine synthase MetE, N-terminal; Cobalamin-independent methionine synthase MetE, C-terminal/archaeal;
MA_10426758g0020	Picea asperata, Oryza sativa	_ILSEEFGWDK(ac)DLAK_	313	90.376	3.3739	2	846.928	cytosol			nucleoside phosphate binding; nucleoside binding; ion binding; hydrolase activity, acting on acid anhydrides; hydrolase activity; nucleotide binding; nucleoside-triphosphatase activity; organic cyclic compound binding; heterocyclic compound binding; ribonucleoside binding; carbohydrate derivative binding; pyrophosphatase activity; catalytic activity; ribonucleotide binding; binding; GTPase activi…	K03234			IPR027417; IPR000795; IPR005517; IPR000640; IPR004161; IPR020568; IPR009022; IPR014721; IPR009000;	P-loop containing nucleoside triphosphate hydrolase; Transcription factor, GTP-binding domain; Translation elongation factor EFG/EF2, domain IV; Translation elongation factor EFG, V domain; Translation elongation factor EFTu/EF1A, domain 2; Ribosomal protein S5 domain 2-type fold; Elongation factor G, III-V domain; Ribosomal protein S5 domain 2-type fold, subgroup; Translation protein, beta-barre…
MA_10427170g0010	Picea asperata, Oryza sativa	_IYEK(ac)YTWK_	613	86.67	-1.8819	2	586.803	mitochondria	single-organism carbohydrate metabolic process; metabolic process; sucrose metabolic process; cellular carbohydrate metabolic process; single-organism metabolic process; single-organism cellular process; single-organism process; oligosaccharide metabolic process; disaccharide metabolic process; carbohydrate metabolic process; primary metabolic process; cellular metabolic process; cellular process…		transferase activity, transferring hexosyl groups; catalytic activity; UDP-glucosyltransferase activity; UDP-glycosyltransferase activity; glucosyltransferase activity; transferase activity, transferring glycosyl groups; sucrose synthase activity; transferase activity;				IPR000368; IPR001296;	Sucrose synthase; Glycosyl transferase, family 1;
MA_10428243g0010	Picea asperata, Oryza sativa	_SAK(ac)YSLFDPCK_	532	63.091	0.1098	2	679.326	plasma membrane	transport; localization; establishment of localization;	intrinsic component of membrane; membrane; integral component of membrane; membrane part;	purine nucleotide transmembrane transporter activity; nucleoside phosphate binding; adenine nucleotide transmembrane transporter activity; substrate-specific transporter activity; ATP:ADP antiporter activity; antiporter activity; substrate-specific transmembrane transporter activity; organic cyclic compound binding; heterocyclic compound binding; ADP transmembrane transporter activity; ribonucleo…	K03301
MA_10431660g0010	Picea asperata, Oryza sativa	_HETAYTK(ac)IVEK_	261	166.7	2.6798	2	680.859	cytosol	single-organism biosynthetic process; organic acid biosynthetic process; oxidation-reduction process; small molecule metabolic process; single-organism cellular process; single-organism process; biosynthetic process; cellular lipid metabolic process; fatty acid metabolic process; primary metabolic process; fatty acid biosynthetic process; organic substance biosynthetic process; cellular metabolic…		oxidoreductase activity, acting on paired donors, with incorporation or reduction of molecular oxygen; acyl-[acyl-carrier-protein] desaturase activity; catalytic activity; oxidoreductase activity; oxidoreductase activity, acting on paired donors, with oxidation of a pair of donors resulting in the reduction of molecular oxygen to two molecules of water;	K03921	DESA1; acyl-[acyl-carrier-protein] desaturase [EC:1.14.19.2]	ath01040 Biosynthesis of unsaturated fatty acids - Arabidopsis thaliana (thale cress); ath00061 Fatty acid biosynthesis - Arabidopsis thaliana (thale cress); ath01212 Fatty acid metabolism - Arabidopsis thaliana (thale cress);	IPR012348; IPR009078;	Ribonucleotide reductase-related; Ferritin-like superfamily;
MA_10435887g0040	Picea asperata, Oryza sativa	_LVPGWTK(ac)PICIGR_	161	106.26	-3.1752	2	769.929	mitochondria	tricarboxylic acid metabolic process; metabolic process; oxidation-reduction process; single-organism metabolic process; small molecule metabolic process; single-organism cellular process; carboxylic acid metabolic process; single-organism process; isocitrate metabolic process; organic acid metabolic process; cellular metabolic process; cellular process; oxoacid metabolic process; organic substan…		magnesium ion binding; nucleoside phosphate binding; ion binding; isocitrate dehydrogenase activity; nucleotide binding; cofactor binding; oxidoreductase activity; oxidoreductase activity, acting on CH-OH group of donors; heterocyclic compound binding; organic cyclic compound binding; oxidoreductase activity, acting on the CH-OH group of donors, NAD or NADP as acceptor; catalytic activity; NAD bi…	K00031	IDH1; isocitrate dehydrogenase [EC:1.1.1.42]	ath00480 Glutathione metabolism - Arabidopsis thaliana (thale cress); ath01230 Biosynthesis of amino acids - Arabidopsis thaliana (thale cress); ath04146 Peroxisome - Arabidopsis thaliana (thale cress); ath01200 Carbon metabolism - Arabidopsis thaliana (thale cress); ath01100 Metabolic pathways - Arabidopsis thaliana (thale cress); ath00020 Citrate cycle (TCA cycle) - Arabidopsis thaliana (thale …	IPR024084;	Isopropylmalate dehydrogenase-like domain;
MA_130835g0010	Picea asperata, Oryza sativa	_TVDGPSMK(ac)DWR_	289	135.99	-1.5734	2	667.314	cytosol	glucose metabolic process; single-organism carbohydrate metabolic process; metabolic process; oxidation-reduction process; single-organism metabolic process; monosaccharide metabolic process; single-organism process; primary metabolic process; carbohydrate metabolic process; organic substance metabolic process; hexose metabolic process;		oxidoreductase activity, acting on the aldehyde or oxo group of donors, NAD or NADP as acceptor; organic cyclic compound binding; heterocyclic compound binding; nucleoside phosphate binding; NAD binding; catalytic activity; binding; oxidoreductase activity, acting on the aldehyde or oxo group of donors; NADP binding; nucleotide binding; cofactor binding; oxidoreductase activity; coenzyme binding;…	K00134	GAPDH; glyceraldehyde 3-phosphate dehydrogenase [EC:1.2.1.12]	ath01230 Biosynthesis of amino acids - Arabidopsis thaliana (thale cress); ath01200 Carbon metabolism - Arabidopsis thaliana (thale cress); ath01100 Metabolic pathways - Arabidopsis thaliana (thale cress); ath00710 Carbon fixation in photosynthetic organisms - Arabidopsis thaliana (thale cress); ath00010 Glycolysis / Gluconeogenesis - Arabidopsis thaliana (thale cress); ath01110 Biosynthesis of s…	IPR020829; IPR016040; IPR020828;	Glyceraldehyde 3-phosphate dehydrogenase, catalytic domain; NAD(P)-binding domain; Glyceraldehyde 3-phosphate dehydrogenase, NAD(P) binding domain;
MA_161096g0010	Picea asperata, Oryza sativa	_HLLHQK(ac)IR_	83	94.662	1.1168	3	362.889	cytosol			ATP binding; nucleoside phosphate binding; nucleoside binding; ion binding; hydrolase activity, acting on acid anhydrides; hydrolase activity; nucleotide binding; nucleoside-triphosphatase activity; ATPase activity; organic cyclic compound binding; heterocyclic compound binding; ribonucleoside binding; carbohydrate derivative binding; pyrophosphatase activity; catalytic activity; ribonucleotide b…	K06174			IPR003593; IPR003439; IPR027417;	AAA+ ATPase domain; ABC transporter-like; P-loop containing nucleoside triphosphate hydrolase;
MA_186351g0010	Picea asperata, Oryza sativa	_GMPHK(ac)FYHGR_	68	111.06	0.36535	2	636.309	cytosol	cellular protein metabolic process; biosynthetic process; primary metabolic process; cellular metabolic process; organic substance biosynthetic process; cellular biosynthetic process; organic substance metabolic process; metabolic process; cellular macromolecule biosynthetic process; cellular macromolecule metabolic process; gene expression; macromolecule metabolic process; protein metabolic proc…	ribosome; organelle; intracellular organelle; intracellular non-membrane-bounded organelle; cell part; intracellular; cytoplasm; macromolecular complex; intracellular part; cell; ribonucleoprotein complex; cytoplasmic part; non-membrane-bounded organelle;	structural constituent of ribosome; structural molecule activity;	K02889	RP-L21e; large subunit ribosomal protein L21e	ath03010 Ribosome - Arabidopsis thaliana (thale cress);	IPR008991;	Translation protein SH3-like domain;
MA_30381g0010	Picea asperata, Oryza sativa	_GTFFGNYK(ac)PR_	411	69.275	0.41477	2	614.809	cytosol	single-organism process; metabolic process; oxidation-reduction process; single-organism metabolic process;		transition metal ion binding; catalytic activity; binding; ion binding; metal ion binding; cation binding; zinc ion binding; oxidoreductase activity;	K18857	ADH1; alcohol dehydrogenase class-P [EC:1.1.1.1]	ath00071 Fatty acid degradation - Arabidopsis thaliana (thale cress); ath00350 Tyrosine metabolism - Arabidopsis thaliana (thale cress); ath00592 alpha-Linolenic acid metabolism - Arabidopsis thaliana (thale cress); ath01100 Metabolic pathways - Arabidopsis thaliana (thale cress); ath00010 Glycolysis / Gluconeogenesis - Arabidopsis thaliana (thale cress); ath01110 Biosynthesis of secondary metabo…	IPR011032; IPR020843; IPR016040; IPR013154; IPR013149;	GroES-like; Polyketide synthase, enoylreductase domain; NAD(P)-binding domain; Alcohol dehydrogenase, N-terminal; Alcohol dehydrogenase, C-terminal;
MA_4137775g0010	Picea asperata, Oryza sativa	_GIEGLFK(ac)K_	46	82.279	0.65449	2	467.274	cytosol	regulation of cellular process; homeostatic process; regulation of biological quality; metabolic process; regulation of biological process; oxidation-reduction process; single-organism metabolic process; cell redox homeostasis; single-organism cellular process; cellular homeostasis; single-organism process; cellular process; biological regulation;		dihydrolipoyl dehydrogenase activity; oxidoreductase activity, acting on NAD(P)H; nucleoside phosphate binding; flavin adenine dinucleotide binding; ion binding; nucleotide binding; cofactor binding; oxidoreductase activity, acting on a sulfur group of donors, NAD(P) as acceptor; oxidoreductase activity; heterocyclic compound binding; organic cyclic compound binding; catalytic activity; binding; …	K00382	DLD; dihydrolipoamide dehydrogenase [EC:1.8.1.4]	ath00260 Glycine, serine and threonine metabolism - Arabidopsis thaliana (thale cress); ath00640 Propanoate metabolism - Arabidopsis thaliana (thale cress); ath00620 Pyruvate metabolism - Arabidopsis thaliana (thale cress); ath01100 Metabolic pathways - Arabidopsis thaliana (thale cress); ath00020 Citrate cycle (TCA cycle) - Arabidopsis thaliana (thale cress); ath00010 Glycolysis / Gluconeogenesi…	IPR016156; IPR004099; IPR023753;	FAD/NAD-linked reductase, dimerisation domain; Pyridine nucleotide-disulphide oxidoreductase, dimerisation domain; FAD/NAD(P)-binding domain;
MA_69756g0010	Picea asperata, Oryza sativa	_ITELLK(ac)VGK_	65	61.48	1.6279	2	521.829	nuclear	cellular protein metabolic process; biosynthetic process; primary metabolic process; cellular metabolic process; organic substance biosynthetic process; cellular biosynthetic process; organic substance metabolic process; metabolic process; cellular macromolecule biosynthetic process; cellular macromolecule metabolic process; gene expression; macromolecule metabolic process; protein metabolic proc…	ribosome; organelle; intracellular organelle; intracellular non-membrane-bounded organelle; cell part; intracellular; cytoplasm; macromolecular complex; intracellular part; cell; ribonucleoprotein complex; cytoplasmic part; non-membrane-bounded organelle;	structural constituent of ribosome; structural molecule activity;
MA_72828g0010	Picea asperata, Oryza sativa	_GYVFK(ac)IMGGCDK_	51	65.043	1.567	2	708.836	cytosol	cellular protein metabolic process; biosynthetic process; primary metabolic process; cellular metabolic process; organic substance biosynthetic process; cellular biosynthetic process; organic substance metabolic process; metabolic process; cellular macromolecule biosynthetic process; cellular macromolecule metabolic process; gene expression; macromolecule metabolic process; protein metabolic proc…	ribosome; organelle; intracellular organelle; intracellular non-membrane-bounded organelle; cell part; intracellular; cytoplasm; macromolecular complex; intracellular part; cell; ribonucleoprotein complex; cytoplasmic part; non-membrane-bounded organelle;	structural constituent of ribosome; structural molecule activity;	K02991	RP-S6e; small subunit ribosomal protein S6e	ath03010 Ribosome - Arabidopsis thaliana (thale cress);
MA_74060g0010	Picea asperata, Oryza sativa	_VLEQLSGQTPVFSK(ac)AR_	51	140.22	0.63866	3	601.332	cytosol	cellular protein metabolic process; biosynthetic process; primary metabolic process; cellular metabolic process; organic substance biosynthetic process; cellular biosynthetic process; organic substance metabolic process; metabolic process; cellular macromolecule biosynthetic process; cellular macromolecule metabolic process; gene expression; macromolecule metabolic process; protein metabolic proc…	ribosome; organelle; intracellular organelle; intracellular non-membrane-bounded organelle; cell part; intracellular; cytoplasm; macromolecular complex; intracellular part; cell; ribonucleoprotein complex; cytoplasmic part; non-membrane-bounded organelle;	structural constituent of ribosome; structural molecule activity;	K02868	RP-L11e; large subunit ribosomal protein L11e	ath03010 Ribosome - Arabidopsis thaliana (thale cress);	IPR022803;	Ribosomal protein L5 domain;
MA_79152g0010	Picea asperata, Oryza sativa	_IADTASHVK(ac)DYAR_	125	193.11	0.018272	3	496.92	plasma membrane		organelle; intracellular organelle; membrane; intracellular non-membrane-bounded organelle; cell part; intracellular; membrane part; intrinsic component of membrane; intracellular part; cell; lipid particle; integral component of membrane; monolayer-surrounded lipid storage body; non-membrane-bounded organelle;

## Sheet: Biological process
GO Terms Level 1	GO Terms Level 2	No. of Protein	Protein IDs
Biological Process	metabolic process	33	MA_10426264g0020	MA_10427039g0010	MA_10428568g0010	MA_10431009g0010	MA_10432758g0010	MA_10433454g0020	MA_10436259g0020	MA_10437148g0010	MA_112104g0010	MA_12191g0010	MA_15508g0010	MA_1839g0010	MA_434977g0010	MA_45916g0010	MA_529552g0010	MA_63231g0010	MA_69667g0010	MA_70965g0010	MA_7469g0010	MA_77810g0010	MA_92421g0010	MA_98979g0010	MA_10090g0010	MA_10427170g0010	MA_10431660g0010	MA_10435887g0040	MA_130835g0010	MA_186351g0010	MA_30381g0010	MA_4137775g0010	MA_69756g0010	MA_72828g0010	MA_74060g0010
	cellular process	4	MA_101085g0010	MA_10427947g0020	MA_10430522g0010	MA_14388g0010
	localization	1	MA_10428243g0010
	biological regulation	1	MA_10427364g0010
